# Supplementary material
Source: PubMed Central journal article supplement (PMC2783507)
Supplement: NIHMS156642-supplement-1.pdf [file NIHMS156642-supplement-1.pdf]

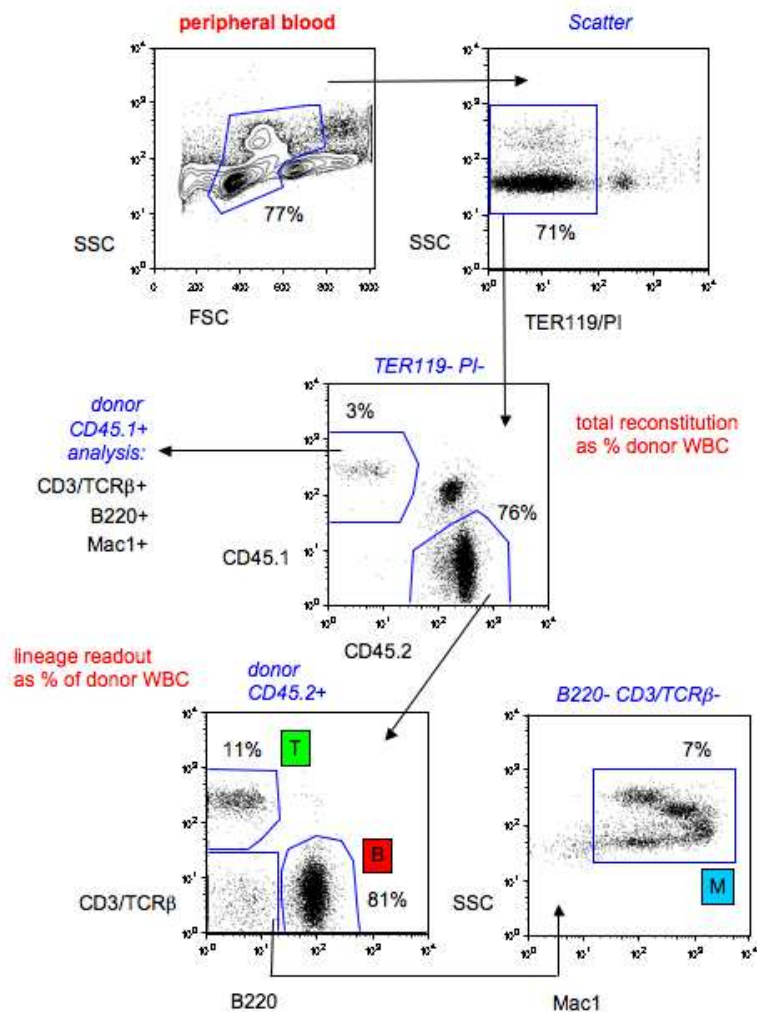

Supplementary Figure 1. Papathanasiou et al.

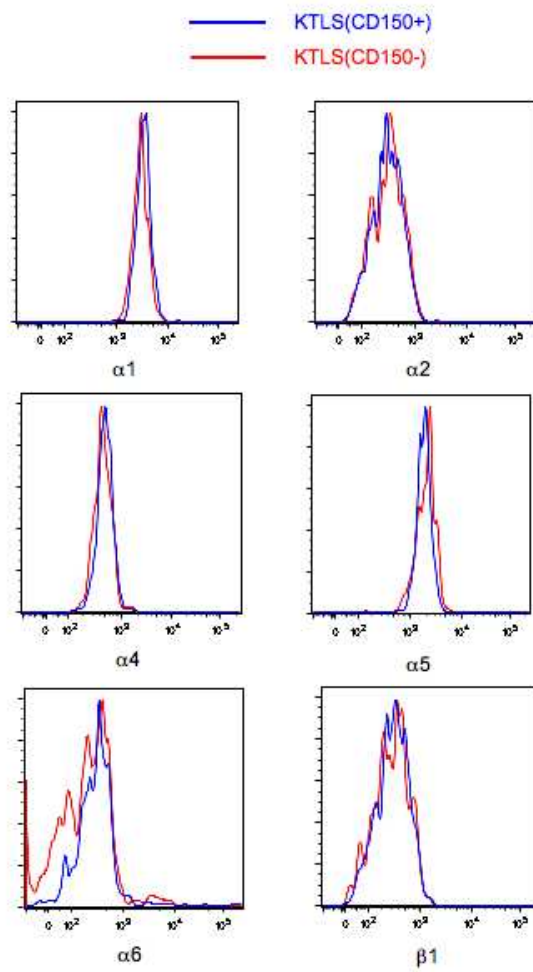

Supplementary Figure 2. Papathanasiou et al.

**Supplementary Table 1. Competitive reconstitution of lethally irradiated recipient mice with KTLS donor cells reveals differences in long-term, multi-lineage engraftment with age of donor HSCs**

| age of donor cells | weeks post transplant | <i>n</i> | -ve mice | +ve mice | mice only showing output in lineage |   |   |     |     |     |       |
|--------------------|-----------------------|----------|----------|----------|-------------------------------------|---|---|-----|-----|-----|-------|
|                    |                       |          |          |          | M                                   | B | T | M/B | M/T | B/T | M/B/T |
| E12.5<br>FL        | 4                     | 8        | 6        | 2        | 0                                   | 0 | 0 | 1   | 0   | 0   | 1     |
|                    | 8                     | 8        | 6        | 2        | 0                                   | 0 | 0 | 1   | 0   | 0   | 1     |
|                    | 12                    | 8        | 6        | 2        | 0                                   | 0 | 0 | 0   | 0   | 0   | 2     |
|                    | 16                    | 5        | 4        | 1        | 0                                   | 0 | 0 | 0   | 0   | 0   | 1     |
| E13.5<br>FL        | 4                     | 7        | 2        | 5        | 0                                   | 0 | 0 | 1   | 0   | 0   | 4     |
|                    | 8                     | 7        | 3        | 4        | 0                                   | 0 | 0 | 0   | 0   | 0   | 4     |
|                    | 12                    | 7        | 3        | 4        | 0                                   | 0 | 0 | 1   | 0   | 0   | 3     |
|                    | 16                    | 7        | 4        | 3        | 0                                   | 0 | 0 | 0   | 0   | 0   | 3     |
| E14.5<br>FL        | 4                     | 5        | 0        | 5        | 0                                   | 0 | 0 | 0   | 0   | 0   | 5     |
|                    | 8                     | 5        | 0        | 5        | 0                                   | 0 | 0 | 0   | 0   | 0   | 5     |
|                    | 12                    | 5        | 0        | 5        | 0                                   | 0 | 0 | 0   | 0   | 0   | 5     |
|                    | 16                    | 5        | 1        | 4        | 0                                   | 0 | 0 | 0   | 0   | 0   | 4     |
| E15.5<br>FL        | 4                     | 9        | 1        | 8        | 0                                   | 0 | 0 | 1   | 0   | 0   | 7     |
|                    | 8                     | 9        | 1        | 8        | 0                                   | 0 | 0 | 0   | 0   | 0   | 8     |
|                    | 12                    | 9        | 1        | 8        | 0                                   | 0 | 0 | 0   | 0   | 0   | 8     |
|                    | 16                    | 9        | 1        | 8        | 0                                   | 0 | 0 | 0   | 0   | 0   | 8     |
| E16.5<br>FL        | 4                     | 7        | 0        | 7        | 0                                   | 0 | 0 | 1   | 0   | 0   | 6     |
|                    | 8                     | 6        | 0        | 6        | 0                                   | 0 | 0 | 0   | 0   | 0   | 6     |
|                    | 12                    | 6        | 0        | 6        | 0                                   | 0 | 0 | 0   | 0   | 0   | 6     |
|                    | 16                    | 6        | 0        | 6        | 0                                   | 0 | 0 | 0   | 0   | 0   | 6     |
| E17.5<br>FL        | 4                     | 4        | 0        | 4        | 0                                   | 0 | 0 | 0   | 0   | 0   | 4     |
|                    | 8                     | 4        | 0        | 4        | 0                                   | 0 | 0 | 0   | 0   | 0   | 4     |
|                    | 12                    | 4        | 0        | 4        | 0                                   | 0 | 0 | 0   | 0   | 0   | 4     |
|                    | 16                    | 4        | 0        | 4        | 0                                   | 0 | 0 | 0   | 0   | 0   | 4     |
| E18.5<br>FL        | 4                     | 4        | 0        | 4        | 0                                   | 0 | 0 | 0   | 0   | 0   | 4     |
|                    | 8                     | 4        | 0        | 4        | 0                                   | 0 | 0 | 0   | 0   | 0   | 4     |
|                    | 12                    | 4        | 0        | 4        | 0                                   | 0 | 0 | 0   | 0   | 0   | 4     |
|                    | 16                    | 4        | 0        | 4        | 0                                   | 0 | 0 | 0   | 0   | 0   | 4     |
| 6wk<br>BM          | 4                     | 10       | 0        | 10       | 0                                   | 0 | 0 | 3   | 0   | 0   | 7     |
|                    | 8                     | 10       | 2        | 8        | 0                                   | 0 | 0 | 0   | 0   | 0   | 8     |
|                    | 12                    | 10       | 2        | 8        | 0                                   | 0 | 0 | 0   | 0   | 0   | 8     |
|                    | 16                    | 10       | 2        | 8        | 0                                   | 0 | 0 | 0   | 0   | 0   | 8     |

25 donor CD45.2<sup>+</sup> KTLS cells were double-sorted as cKit<sup>+</sup>Lin<sup>-</sup>/lo)Sca1<sup>+</sup>Thy1.1(lo)Flk2<sup>-</sup> and transplanted into lethally irradiated CD45.1<sup>+</sup> recipient animals along with recipient-type 3x10<sup>5</sup> competitor cells from adult whole BM for radioprotection. The lineage (Lin) cocktail for donor KTLS cells sourced from FL contained the following mature cell markers: B220, CD3, CD4, CD5, CD8, Gr1, TER119. Mac1 was also used in the Lin cocktail for only the 8 week old donor bone marrow. Donor cell reconstitution was assayed via readout in lysed, TER119<sup>-</sup> peripheral blood cells of recipient mice up to 16 weeks post transplantation. Recipient animals were considered positive for engraftment if they boasted a robust population of large (SSC<sub>(med-hi)</sub>) myeloid (Mac1<sup>+</sup>) donor cells above background (>0.3%). Lineage potential was assayed by FACS analysis of donor-derived Mac1<sup>+</sup> (myeloid, M, lineage), B220<sup>+</sup> (B lineage) and CD3/TCRβ<sup>+</sup> (T lineage) cells.

## SUPPLEMENTARY FIGURE LEGENDS

Papathanasiou et al.

### “Evaluation of the Long-Term Reconstituting Subset of Hematopoietic Stem Cells with CD150”

**Supplementary Figure 1.** FACS gating strategy used to analyze in vivo reconstitution and lineage distribution of donor CD45.2<sup>+</sup>CD45.1<sup>-</sup> KTLS(CD150<sup>+</sup>) and CD45.2<sup>-</sup>CD45.1<sup>+</sup> KTLS(CD150<sup>-</sup>) cells in CD45.2<sup>+</sup>CD45.1<sup>+</sup> recipient peripheral blood from 4 weeks post-transplant onwards. Cells were first gated according to Scatter, excluding FSC(small) (red cells) and FSC(large) (doublet) cells. Live (Propidium Iodide-negative), TER119<sup>-</sup> cells were then gated, to compare overall CD45.2 versus CD45.1 donor white blood cell (WBC) reconstitution. Each donor subset, whether CD45.2<sup>+</sup>CD45.1<sup>-</sup> or CD45.2<sup>-</sup>CD45.1<sup>+</sup>, was then analyzed according to the expression of B220<sup>+</sup>, CD3/TCR $\beta$ <sup>+</sup> and Mac1+SSC(large) to assay the output of the B, T and M lineages, respectively. A similar gating strategy was utilized to assay the in vivo reconstitution and donor lineage distribution where only one CD45.2<sup>+</sup> donor subset was transplanted into CD45.1<sup>+</sup> recipients.

**Supplementary Figure 2.** Expression of  $\alpha$ 1 (Ha31/8),  $\alpha$ 2 (Hm $\alpha$ 2),  $\alpha$ 4 (R1-2),  $\alpha$ 5 (5H10-27),  $\alpha$ 6 (GoH3), and  $\beta$ 1 (HM $\beta$ 1-1) integrins on the cell surface of KTLS(CD150<sup>+</sup>) (blue) and KTLS(CD150<sup>-</sup>) (red) bone marrow cells.
